# Supplementary material for: Synthesis of Ag nanoparticles encapsulated in hollow silica spheres for efficient and selective removal of low-concentrated sulfur compounds
Source: Royal Society of Chemistry journal article supplement (doi:10.1039/c7ta08918j), 2017-01-01
Supplement: c7ta08918j1.pdf [file c7ta08918j1.pdf]

## **Electronic Supplementary Information (ESI)**

# **Synthesis of Ag nanoparticles encapsulated in hollow silica spheres for efficient and selective removal of low-concentrated sulfur compounds**

**Kensei Fujiwara,<sup>a,c</sup> Yasutaka Kuwahara,<sup>a,b</sup> Yuki Sumida,<sup>a</sup> Hiromi Yamashita<sup>a,b\*</sup>**

<sup>a</sup> Division of Materials and Manufacturing Science, Graduate School of Engineering, Osaka University, 2-1 Yamada-oka, Suita, Osaka 565-0871, Japan

<sup>b</sup> Unit of Elements Strategy Initiative for Catalysts & Batteries (ESICB), Kyoto University, Katsura, Kyoto 615-8520, Japan

<sup>c</sup> Paper Technology Center, Ehime Institute of Industrial Technology, 127 Mendori-cho, Shikokuchuo 799-0113, Japan

\* Tel: (+81) 6-6879-7457, Fax: (+81) 6-6879-7457

E-mail: yamashita@mat.eng.osaka-u.ac.jp

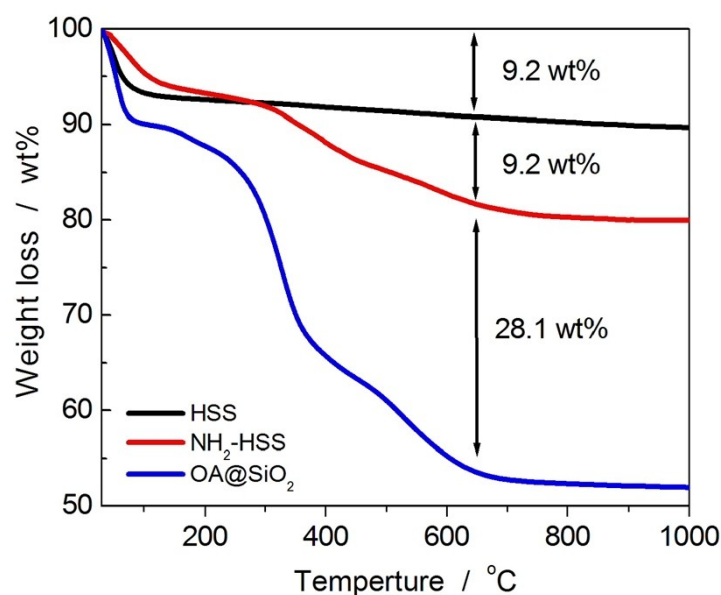

**Fig. S1** Weight loss curves of HSS, NH<sub>2</sub>-HSS and OA@SiO<sub>2</sub> in a flow of air. The weight loss of HSS seen at 100 °C <  $T$  (corresponding to 9.2 wt%) is due to the removal of absorbed water. The NH<sub>2</sub>-HSS showed the additional weight loss seen at  $T$  < 650 °C (corresponding to 9.2 wt%) which is attributed to the breakdown of the amine groups and the alkyl groups of APTES. The OA@SiO<sub>2</sub> shows the further weight loss seen at  $T$  < 650 °C (corresponding to 21.7 wt%) which is due to combustion of the oleic acid. From these results, it is confirmed that the prepared NH<sub>2</sub>-HSS retained the amine groups while the oleic acid was removed.

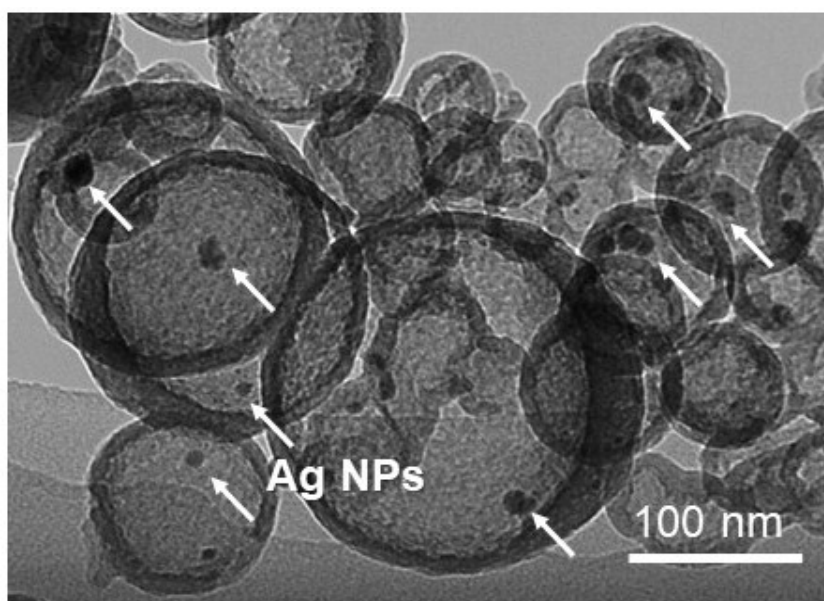

**Fig. S2** TEM image of Ag@HSS (wide region).

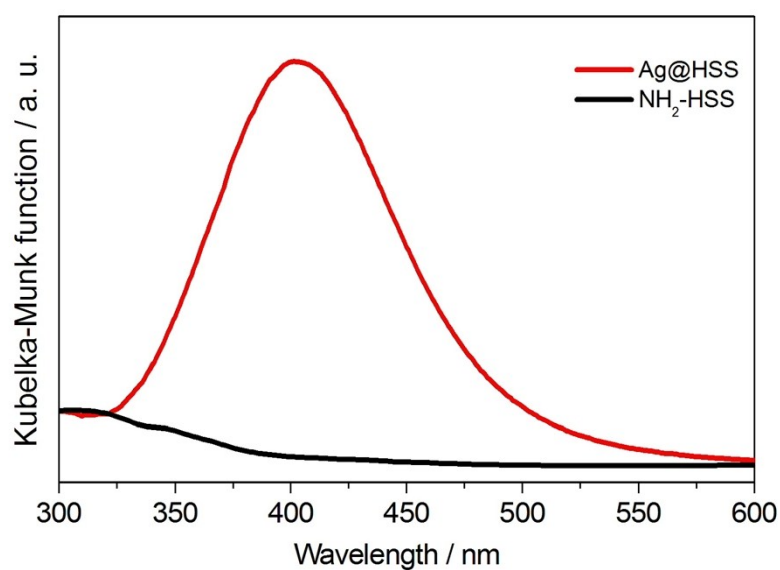

**Fig. S3** UV-vis spectra of  $\text{NH}_2\text{-HSS}$  and  $\text{Ag@HSS}$ . The spectra of  $\text{Ag@HSS}$  showed the peak at 400 nm derived from AgNPs.

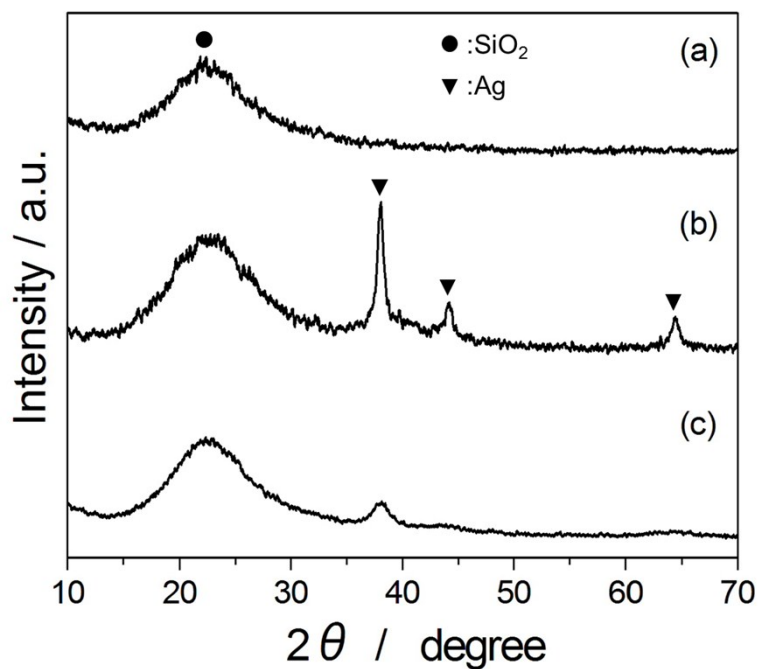

**Fig. S4** XRD patterns of (a)  $\text{NH}_2\text{-HSS}$ , (b)  $\text{Ag/SiO}_2$  and (c)  $\text{Ag@HSS}$ . The broad peak seen at  $2\theta = 15\text{--}30^\circ$  is associated with amorphous nature of silica.

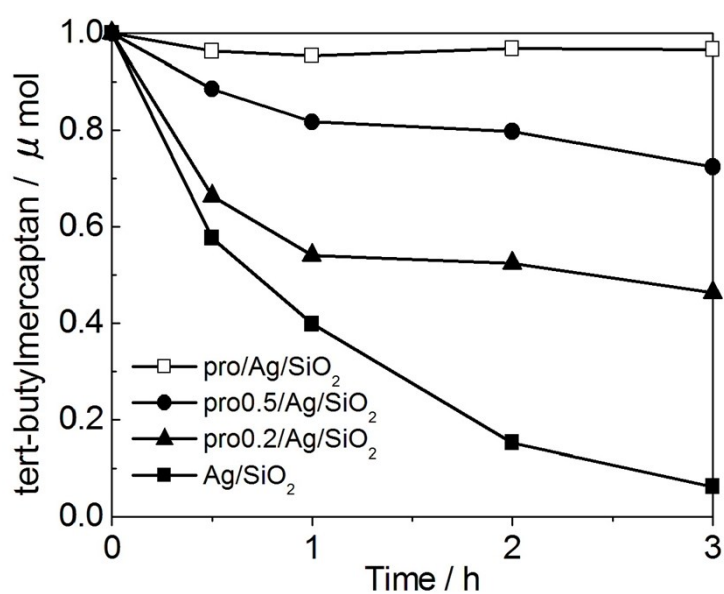

**Fig. S5** Adsorption kinetics of TBM (*tert*-buthylmercaptan) over Ag/SiO<sub>2</sub> and protein adsorbed Ag/SiO<sub>2</sub>. The amount of adsorbed protein to the surface of 10 mg of Ag/SiO<sub>2</sub> were 2 mg (pro0.2/Ag/SiO<sub>2</sub>), 5 mg (pro0.5/Ag/SiO<sub>2</sub>) and 10 mg (pro/Ag/SiO<sub>2</sub>).

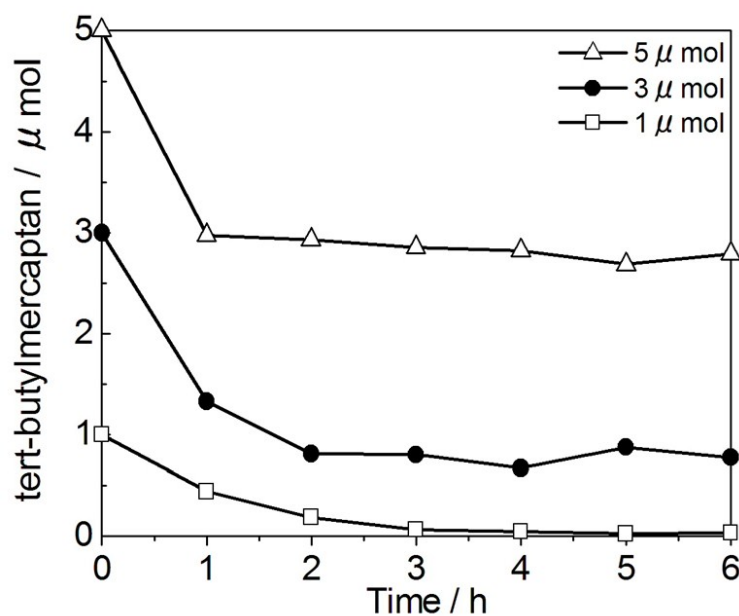

**Fig. S6** Adsorption kinetics of 1 μmol, 3 μmol and 5 μmol of TBM (*tert*-buthylmercaptan) over Ag@HSS.

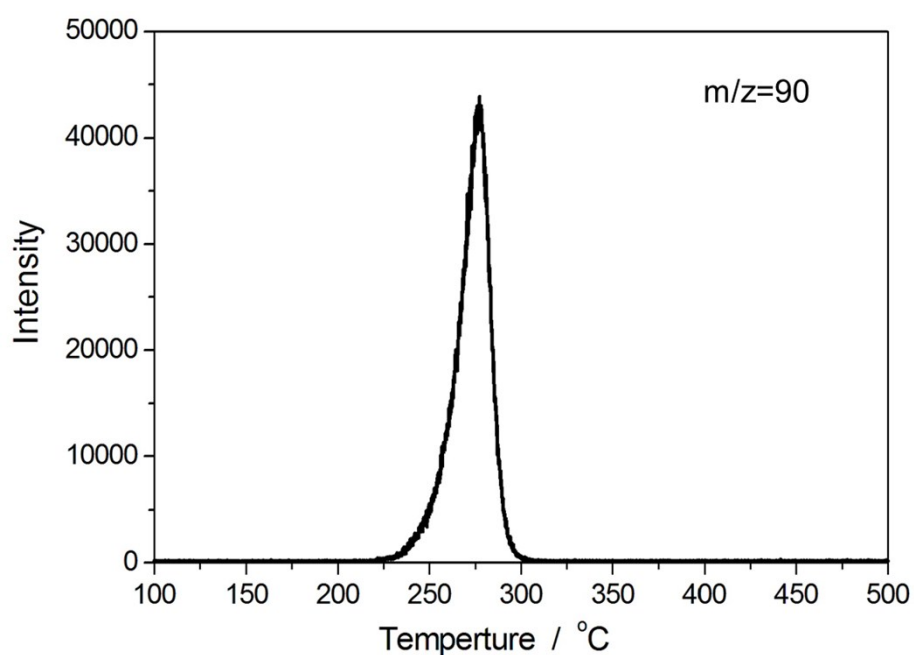

**Fig. S7** EGA profile ( $m/z=90$ ) obtained from TBM (*tert*-buthylmercaptan) adsorbed Ag@HSS. The peak caused by the desorption of TBM is observed around 220-310 °C, confirming that the adsorbed TBM is completely desorbed from Ag/@HSS by heat treatment at 500 °C.

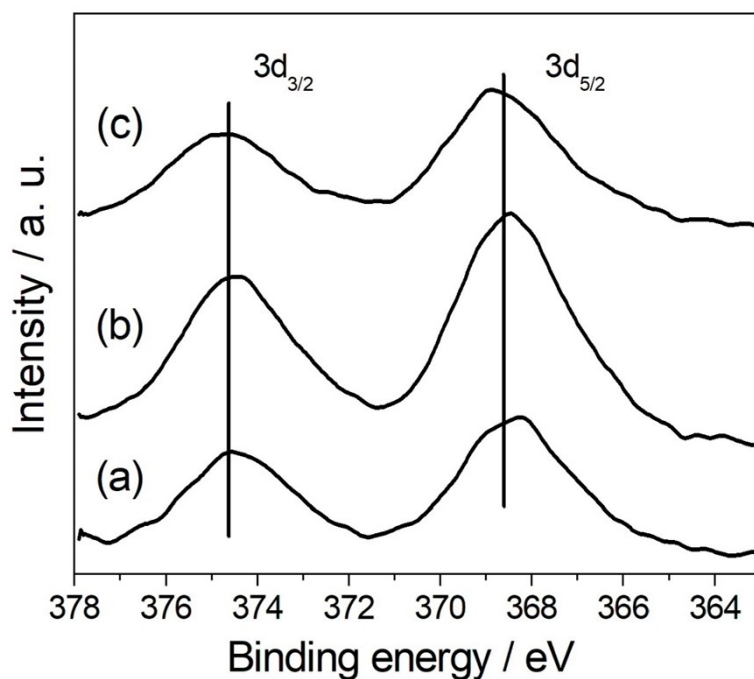

**Fig. S8** Ag 3d XPS spectra of Ag@HSS (a) as-synthesized, (b) after adsorption of TBM (*tert*-buthylmercaptan), (c) after regeneration for 2 h at 500 °C.

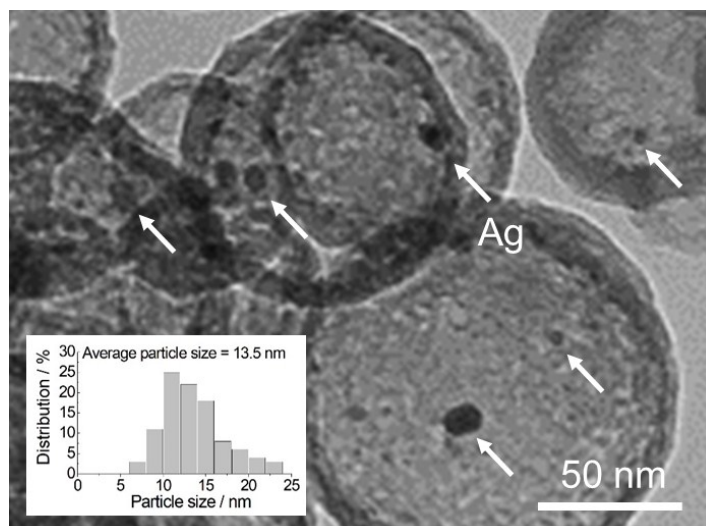

**Fig. S9** TEM image of Ag@HSS after regeneration treatment for 2 h at 500 °C. The inset shows the particle size distribution diagram of AgNPs.

**Table S1** Adsorption capacities of Ag@HSS and reported samples toward sulfur compounds.

| Sample | Adsorbate <sup>a</sup> | Support                            | Adsorption capacity<br>[mol-S / mol-Ag] | Ref.       |
|--------|------------------------|------------------------------------|-----------------------------------------|------------|
| Ag@HSS | TBM                    | Hollow silica sphere               | 0.48                                    | This study |
| AgNa-Y | TBM                    | Y-zeolite                          | 0.34                                    | 1          |
| AgNa-Y | TBM                    | Y-zeolite                          | 0.35                                    | 2          |
| Ag-X   | TBM                    | X-zeolite                          | 0.62                                    | 3          |
| AgSi   | TBM                    | Amorphous silica                   | 1.06                                    | 4          |
| Ag-MSN | DBT                    | Mesoporous silica<br>nanoparticles | 0.21                                    | 5          |

<sup>a</sup> TBM = *tert*-butylmercaptan, DBT = Dibenzothiophen

- [1] D. Lee, E. Y. Ko, H. C. Lee, S. Kim and E. D. Park, *Appl. Catal. A*, 2008, **334**, 129-136.
- [2] S. Satokawa, Y. Kobayashi and H. Fujiki, *Appl. Catal. B*, 2005, **56**, 51-56.
- [3] R. Barzamini, C. Falamaki and R. Mahmoudi, *Fuel*, 2014, **130**, 46-53.
- [4] K. Shimizu, S. Komai, T. Kojima, S. Satokawa and A. Satsuma, *J. Phys. Chem. C*, 2007, **111**, 3480-3485.
- [5] J. M. Palomino, D. T. Tran, J. L. Hauser, H. Dong and S. R. J. Oliver, *J. Mater. Chem. A*, 2014, **2**, 14890-14895.
